# Supplementary material for: A Dark Target research aerosol algorithm for MODIS observationsover eastern China: Increasing coverage while maintaining accuracyat high aerosol loading
Source: Copernicus journal article supplement (doi:10.5194/amt-2020-450), 2020-12-03
Supplement: Supplementary file [file amt-2020-450-AC3-supplement.pdf]

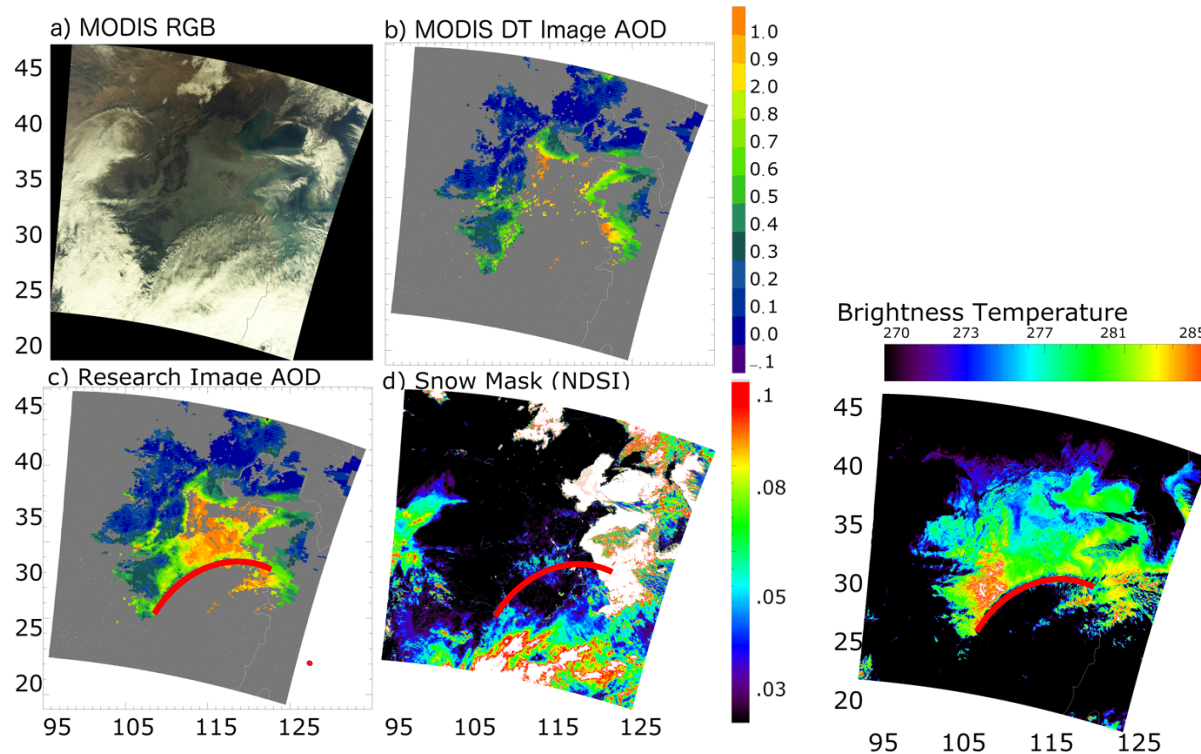

Example figure, A pollution event over eastern China on Terra MODIS sensor with granule id of 2013348.0310. a) MODIS Terra RGB image, b) MODIS Dark Target (DT) AOD at  $.055 \mu\text{m}$  for all available retrievals (QA = 0 to 3), c) Research AOD at  $0.55 \mu\text{m}$ , for all available retrievals, d) Snow mask, e)  $11 \mu\text{m}$  Brightness Temperature map. The red line shows the cloud edge.
